# Supplementary material for: Inherent Flame-Retardant, Humid Environment Stable and Blue Luminescent Polyamide Elastomer Regulated by Siloxane Moiety
Source: MDPI journal article supplement (doi:10.3390/polym14091919), 2022-05-09
Supplement: s1 [file s1]

## Supporting Information

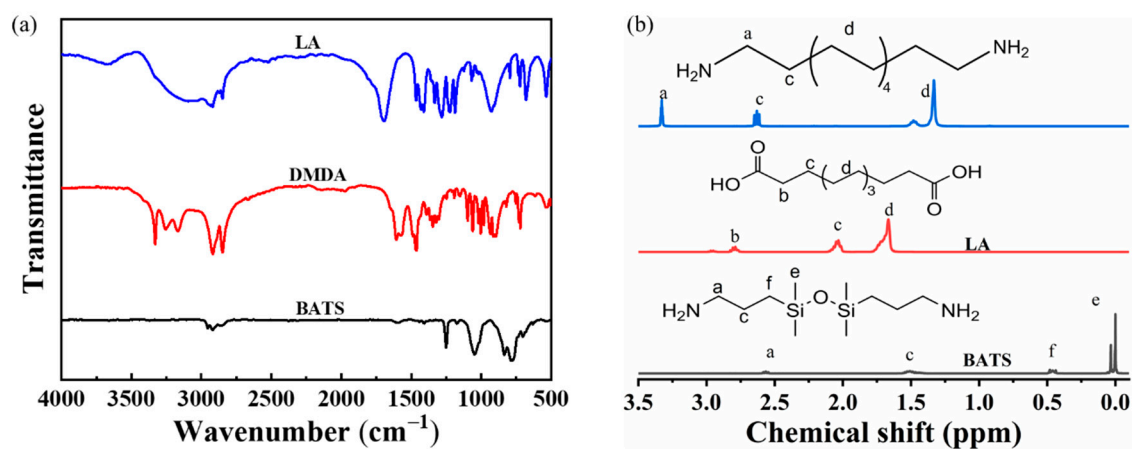

**Figure S1.** FT-IR (a) and <sup>1</sup>H NMR (b) spectra of BATS, LA and DMDA monomers.

**Table S1.** The DSC test results of PA1212.

| Sample              | $T_g$ (°C) | $T_m$ (°C) | $T_c$ (°C) | $\Delta T$ (°C) | $\Delta H$ (J/g) | $X_c^b$ (%) |
|---------------------|------------|------------|------------|-----------------|------------------|-------------|
| PA1212 <sup>a</sup> | 43         | 182        | 161        | 26              | 58.6             | 48.5        |

<sup>a</sup> homemade and  $[\eta] = 2.2$  dL/g; <sup>b</sup> the standard enthalpy is 121.8 J/g[43].

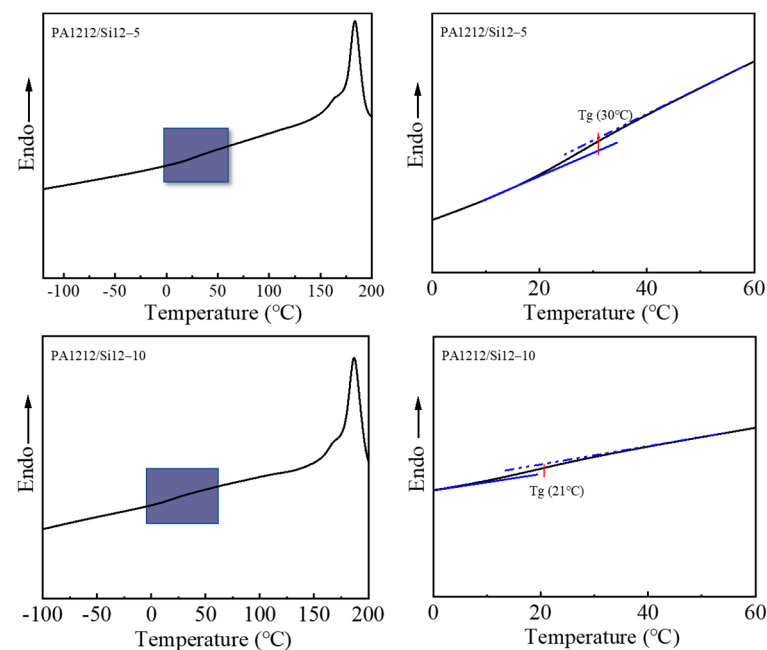

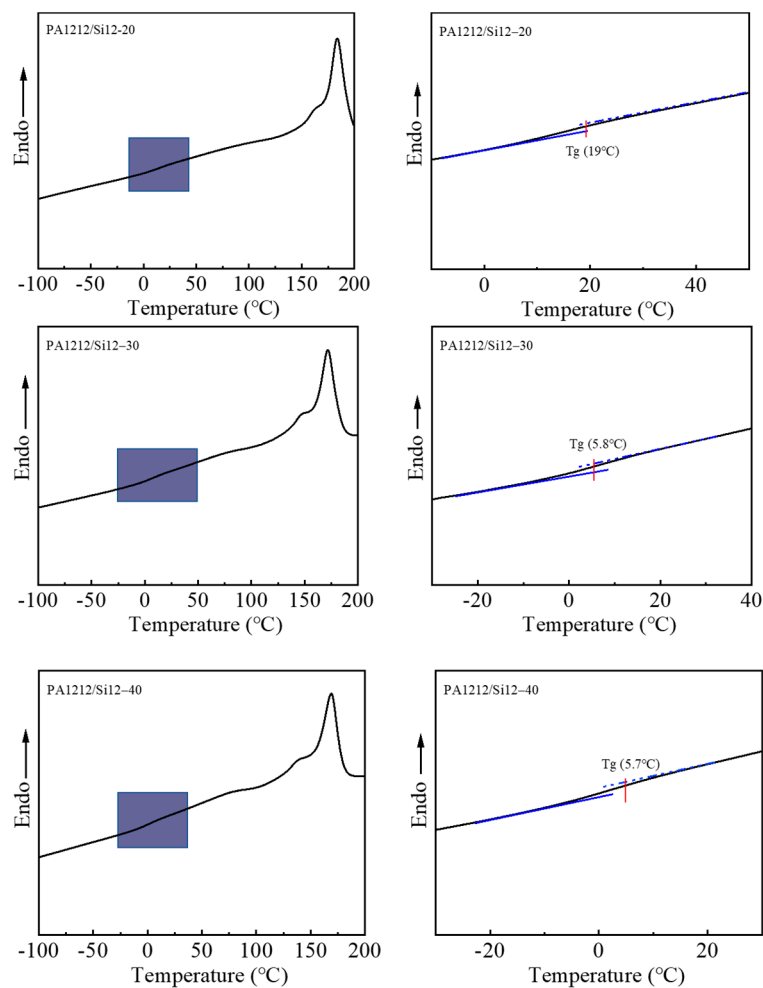

**Figure S2.** Determination of  $T_g$  of PA1212/Si12 copolymers by DSC (the second heating curves, 100 °C/min, under  $N_2$  atmosphere).

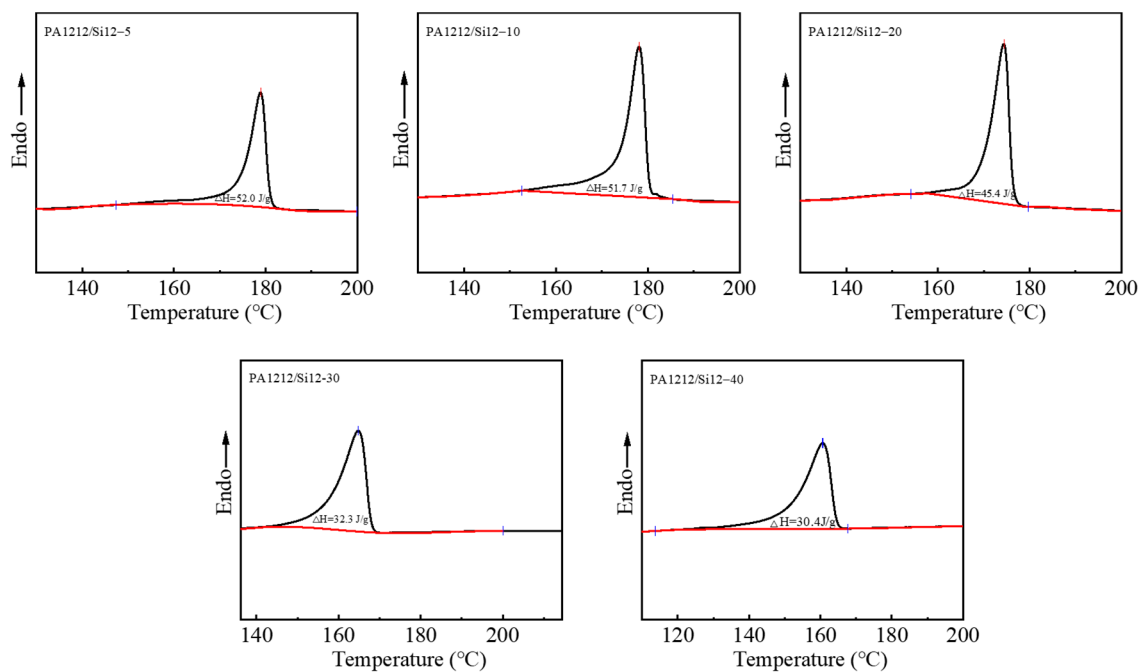

**Figure S3.** Determination of  $\Delta H$  of PA1212/Si12 copolymers by DSC (the second heating curves, 10 °C/min, under  $N_2$  atmosphere).

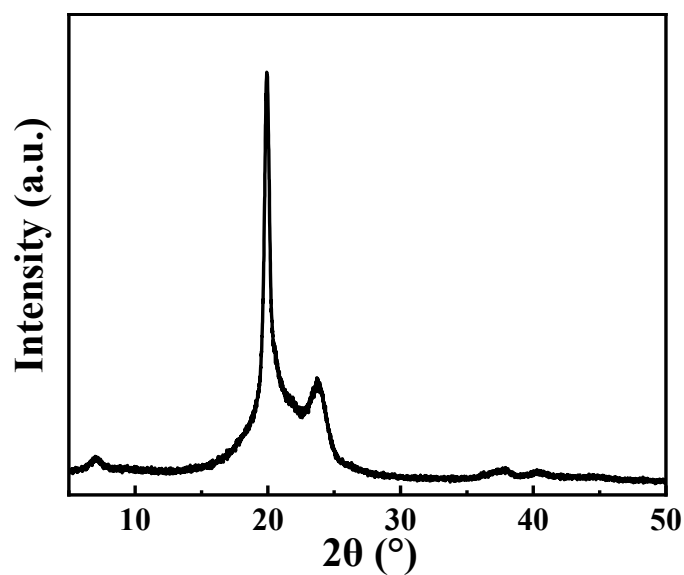

**Figure S4.** The WAXD pattern of PA1212.

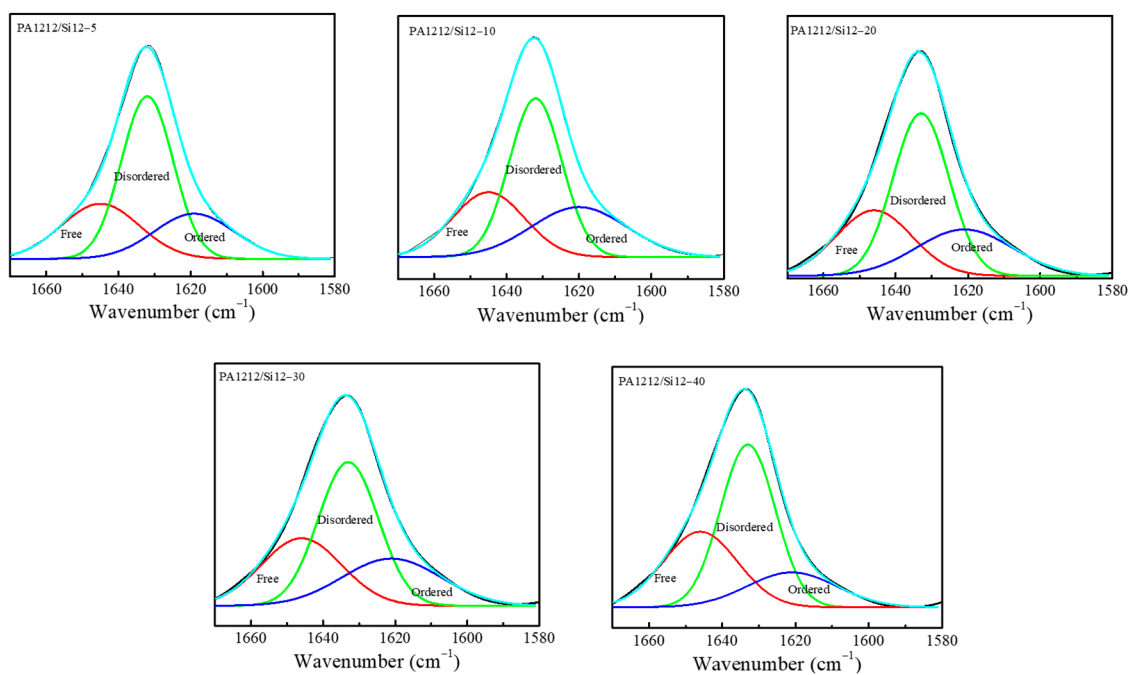

**Figure S5.** Deconvolution of Amide I band in IR spectra of PA1212/Si12 copolymers.

**Table S2.** The deconvolution results and HBI of PA1212/Si12 copolymers.

| Sample         | Peak Area of Free C=O | Peak Area of disordered- hydrogen-bonded C=O | Peak Area of ordered- hydrogen-bonded C=O | HBI  |
|----------------|-----------------------|----------------------------------------------|-------------------------------------------|------|
| PA1212/Si12-5  | 1.27                  | 2.50                                         | 1.07                                      | 2.79 |
| PA1212/Si12-10 | 1.10                  | 1.97                                         | 1.13                                      | 2.81 |
| PA1212/Si12-20 | 1.71                  | 3.12                                         | 1.53                                      | 2.58 |
| PA1212/Si12-30 | 1.62                  | 2.58                                         | 1.39                                      | 2.45 |
| PA1212/Si12-40 | 1.39                  | 2.21                                         | 0.77                                      | 2.14 |

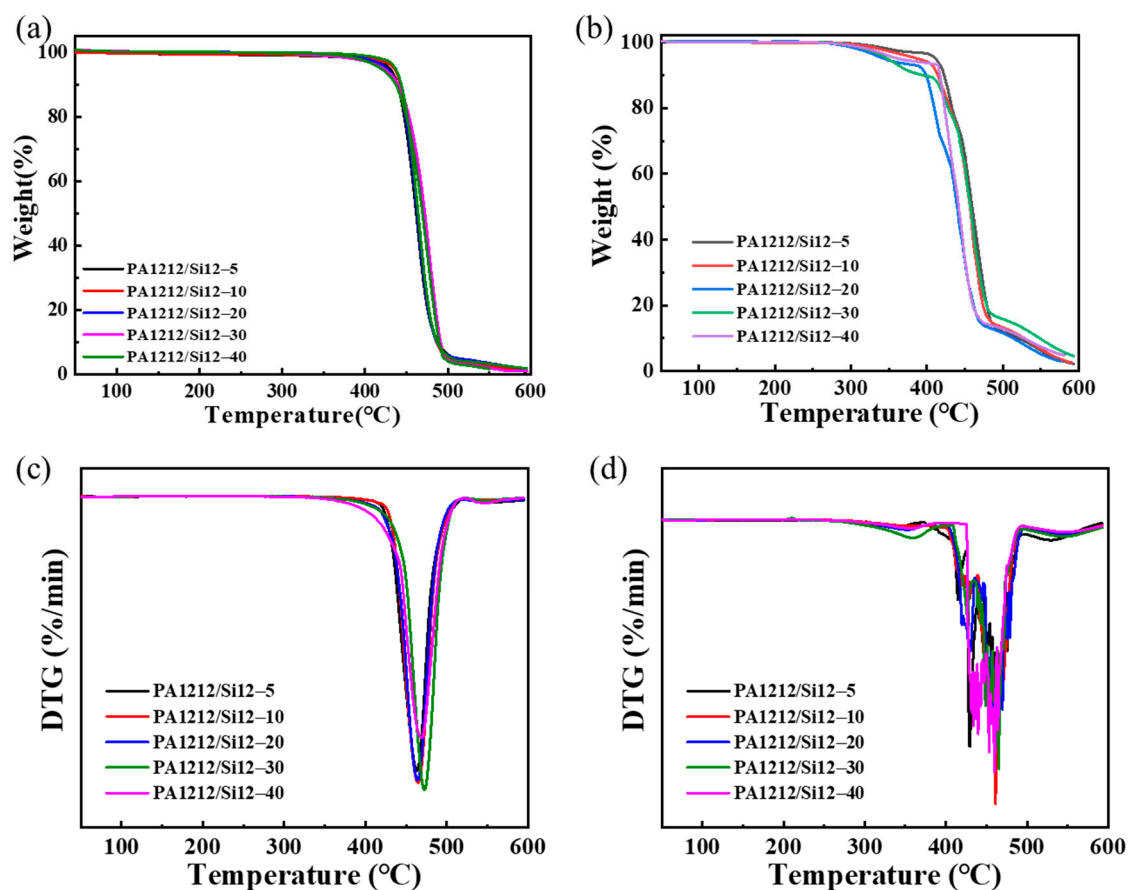

**Figure S6.** TGA and DTG curves of PA1212/Si12 copolymers (a) and (c) N<sub>2</sub> atmosphere; (b) and (d) under air atmosphere.

**Table S3.** TG characteristic parameters of PA1212 and TPAE-22.

| Sample               | N <sub>2</sub> atmosphere |                        |             | Air atmosphere       |                        |                        |             |
|----------------------|---------------------------|------------------------|-------------|----------------------|------------------------|------------------------|-------------|
|                      | T <sub>5%</sub> (°C)      | T <sub>max1</sub> (°C) | Residue (%) | T <sub>5%</sub> (°C) | T <sub>max1</sub> (°C) | T <sub>max2</sub> (°C) | Residue (%) |
| PA1212 <sup>a</sup>  | 405                       | 455                    | 1.46        | 367                  | 455                    | 532                    | 0           |
| TPAE-22 <sup>b</sup> | 392                       | 434                    | 0.26        | 325                  | 409                    | 530                    | 1.67        |

<sup>a</sup>  $[\eta]$  of PA1212 is 2.2 dL/g; <sup>b</sup> TPAE-22 was synthesized by PA1212 prepolymer and ED2003 (purchased from Huntsman, USA)[4] and  $[\eta]$  is 1.7 dL/g.

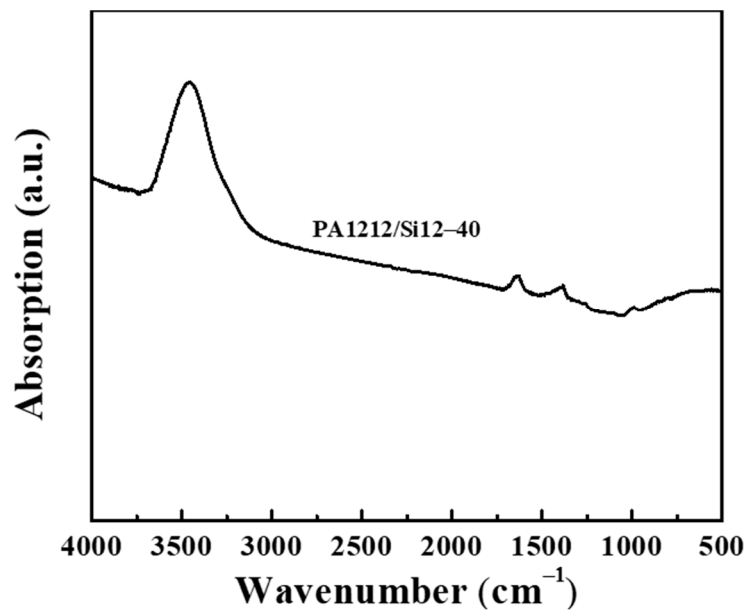

**Figure S7.** FT-IR spectra of PA1212/Si12-40 after combustion.

**Table S4.** Water contact angle and bibulous rate of PA1212 and TP AE.

| Sample  | Water contact angle (°) | Bibulous rate (%) |
|---------|-------------------------|-------------------|
| PA1212  | 84                      | 0.63              |
| TPAE-22 | 31                      | 1.39              |

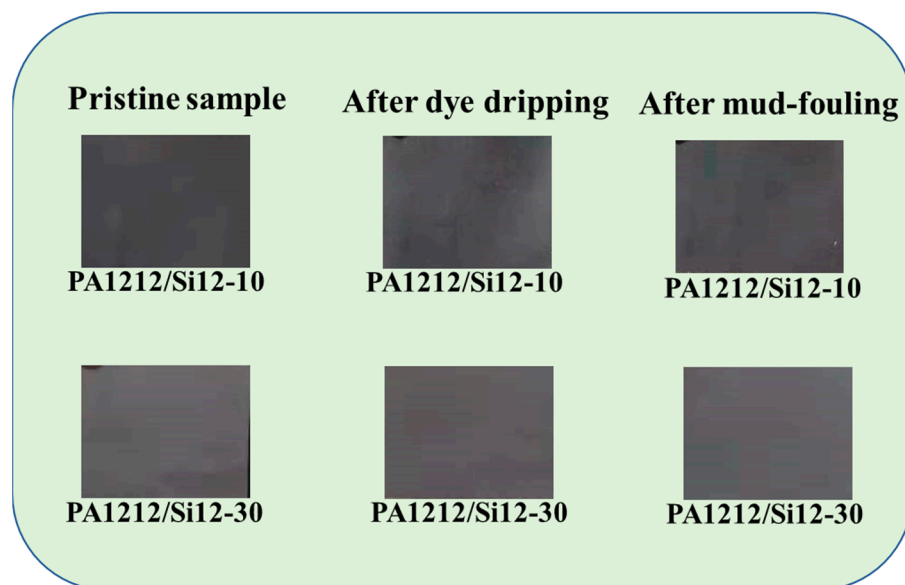

**Figure S8.** The digital images for PA1212/Si12-10 and -30 after dye dripping and mud contamination tests.
